# Supplementary material
Source: publisher figshare collection journal article supplement (https://acs.figshare.com/ndownloader/files/14730395)

## Supplementary Table

**Supplementary Table 1.** Pharmacokinetic (PK) parameters of curcumin-O-glucuronide in human plasma in 2 CM

| PK Parameters                  | Description                                                                   | Estimation (CV%) |
|--------------------------------|-------------------------------------------------------------------------------|------------------|
| <b>kmixed (h<sup>-1</sup>)</b> | First order Intestinal absorption, UGT metabolism and transport rate constant | 9.6000(154076)   |
| <b>tlag (h)</b>                | Absorption delay                                                              | 0.8900 (16.11)   |
| <b>Cmax (ng/ml)</b>            | Maximum concentration predicted                                               | 30.440 (10.20)   |
| <b>tmax (h)</b>                | Time to reach maximum concentration                                           | 2.0880 (41.5)    |
| <b>AUC0-12h (ng/ml*h)</b>      | Area under the curve 0 to 12h                                                 | 379.87 (237.9)   |
| <b>AUC0-∞ (ng/ml*h)</b>        | Area under the curve 0 to infinity                                            | 14576 (36900)    |

## Supplementary Figures

### Supplementary Figure 1. Plasma concentration-time profile of curcumin-O-glucuronide.

Concentration-time profile of curcumin-O-glucuronide (COG) as described by a two-compartment model. Experimental observation data are shown as the mean  $\pm$  SD and the solid line represents the Phoenix WinNonlin model predicted curves after a 4 g oral dose of curcumin to 12 healthy subjects.

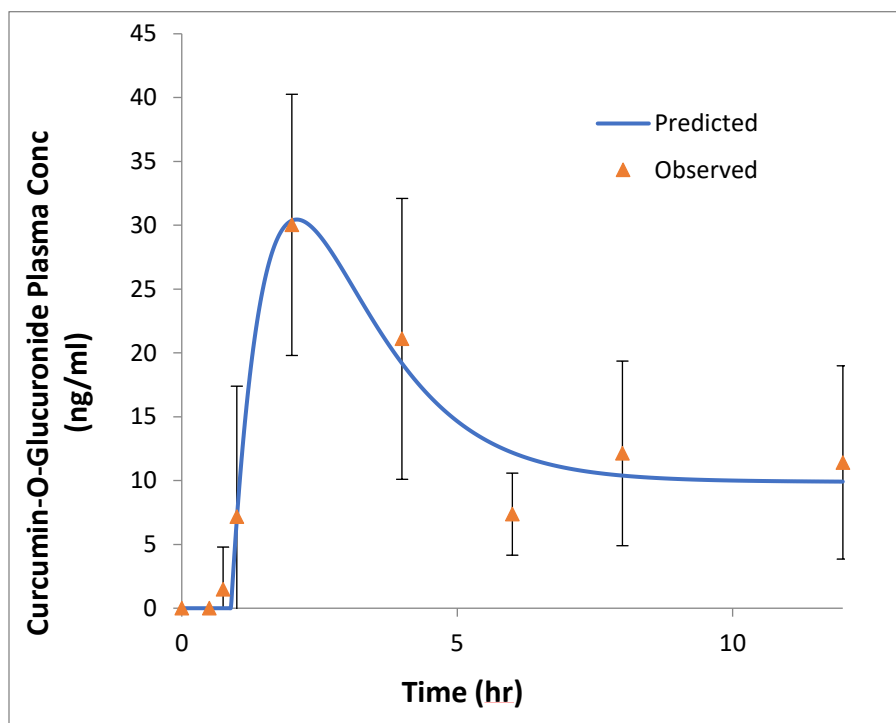

**Supplementary Figure 2. Antioxidant and epigenetic activity by COG in HepG2C8 cells. (A)**

HepG2C8 cells were seeded in 96-well plates and treated with COG for 24 hours. Cytotoxicity of COG was measured by MTS assay (B) Induction of Nrf2-ARE luciferase by COG and results were normalized to protein concentration and DMSO control. (C) Induction of HO-1 and decrease in epigenetic mRNA expression compared to control after 24-hour incubation with COG. mRNA expression was normalized to GAPDH control. \*  $P < 0.05$  compared to DMSO control.

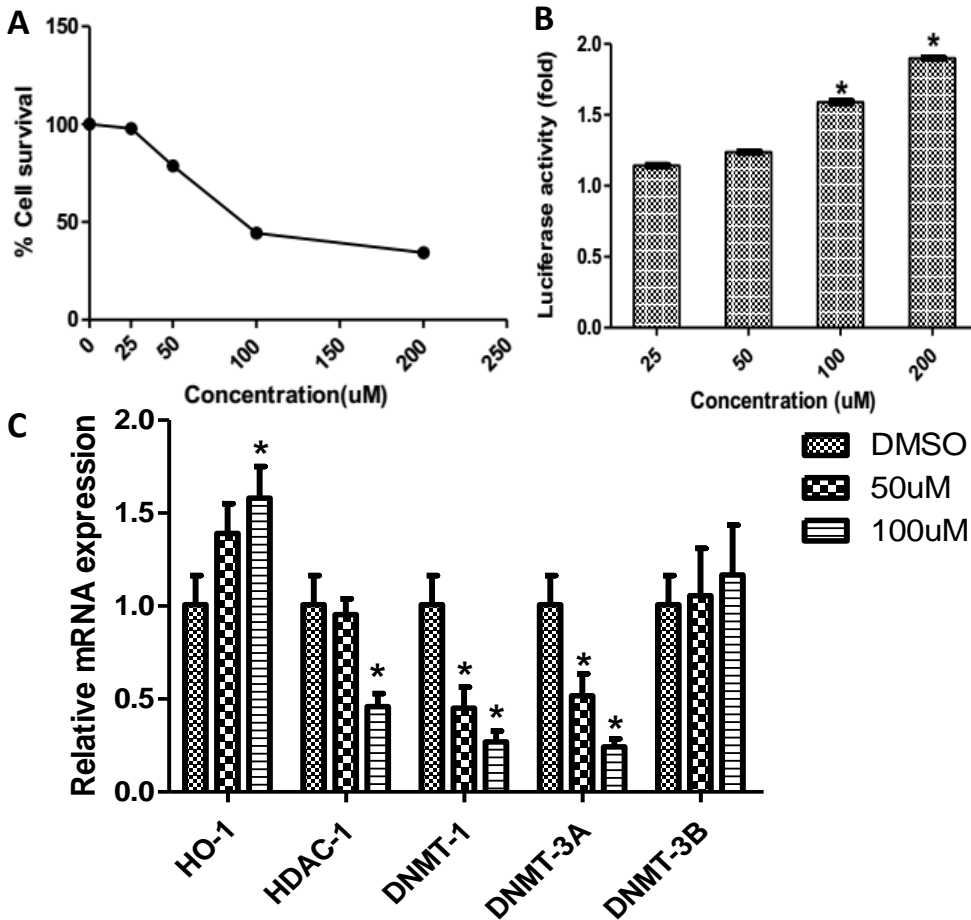

Supplement: Supplementary file 1 [file 14730395]
